# Supplementary material
Source: PubMed Central journal article supplement (PMC3577108)
Supplement: supp_kxs018_kxs018supp.pdf [file supp_kxs018_kxs018supp.pdf]

# Deriving benefit of early detection from biomarker-based prognostic models

L. Y. T. Inoue\*,<sup>1</sup> R. Gulati,<sup>2</sup> C. Yu,<sup>3</sup> M. Kattan<sup>3</sup> and R. Etzioni<sup>2</sup>

<sup>1</sup>Department of Biostatistics, University of Washington

<sup>2</sup>Division of Public Health Sciences, Fred Hutchinson Cancer Research Center

<sup>3</sup>Cleveland Clinic

## Appendix A1. Alternative biomarker model

In this section we re-derive some results from the manuscript, but under an alternative mean function describing the biomarker trajectory. Assume that the mean function is  $m(t) = \exp\{\theta_1 + \theta_2 t + \theta_3(t - a_O)^+\}$ , where  $t$  is time and it relates to subject's age. To make the intercept interpretable we assume  $t = 0$  refers to a known reference age, say 20 years old. Thus,  $\exp(\theta_1)$  is the mean PSA level at the reference age. Next,  $\exp(\theta_2)$  refers to the pre-onset biomarker change rate while  $\exp(\theta_1 + \theta_2)$  refers to the post-onset biomarker change rate.

Under the above mean function model, we can re-write lead time in terms of the biomarker change rate and the biomarker levels at  $a_A$  and  $a_E$  as  $\ell = a_A - a_E = \frac{\log\{m(a_A)\} - \log\{m(a_E)\}}{\theta_2 + \theta_3}$ .

We can re-write the biomarker level at early detection as

$$m(a_E) = m(a_A) \exp(-(\theta_2 + \theta_3)\ell).$$

Thus, the hazard function  $h_2$  implies that the hazard ratio for survival benefit takes the form

$$HR_2 = \exp[\beta\{m(a_E) - m(a_A)\}] = \exp[\beta m(a_A)\{\exp(-(\theta_2 + \theta_3)\ell) - 1\}],$$

---

\*Corresponding author. Email: linoue@u.washington.edu.

while under hazard function  $h_3$ ,

$$HR_3 = \exp[\beta_1 m(a_A) \{ \exp(-(\theta_2 + \theta_3)\ell) - 1 \} - \beta_2 \ell].$$

Using the PSA model, we can re-express age at early detection  $a_E$  as

$$a_E = a_O \left[ \frac{\theta_3}{\theta_2 + \theta_3} \right] + \left[ \frac{\log\{m(a_E)\} - \theta_1}{\theta_2 + \theta_3} \right].$$

The expression for  $RHR_3(m_0, m_1)$  uses ages at early detection  $a_{S_1}$  and  $a_{S_0}$  obtained using the above equation when considering PSA threshold levels  $m_1$  and  $m_0$ , respectively.

The following Figure 1 and Table 1 show results under the alternative biomarker mean model. We use  $\theta_1 = 0.30$ ,  $\theta_2 = 0.03$ , and  $\theta_3 = 0.10$  or  $0.20$ ; that is, at the reference age, the biomarker level is  $\exp(0.30) = 1.35$  ng/mL. The biomarker changes at a rate equal to 3% per year before onset. After onset, the rate of change is increased by 10% or 20% per year.

The results are similar to those discussed in the manuscript.

[Table 1 about here.]

[Figure 1 about here.]

## Appendix A2. Weibull model

Assume a Weibull baseline hazard function so that  $h_0(v) = \eta\gamma^\eta v^{\eta-1}$ , where  $\eta > 0$  and  $\gamma > 0$ . When  $\eta = 1$ , this reduces to a exponential survival model. The Weibull baseline hazard function decreases in  $v$  when  $0 < \eta < 1$  and increases in  $v$  when  $\eta > 1$ .

Assuming a Weibull baseline hazard function implies that time  $T$  to disease-specific death is Weibull with parameters  $\eta$  and  $\gamma \exp(X'\beta/\eta)$ . For any  $p \in (0, 1)$ , let  $Q(p; T) = S^{-1}(p)$  denote the quantile function. In the above,  $S^{-1}(\cdot)$  is inverse of the survival function. Under the Weibull distribution,

$$Q(p; T | X) = \left\{ \frac{-\log(p)}{\gamma^\eta \exp(X'\beta)} \right\}^{1/\eta}.$$

Utilizing the above quantile function one can show that, under the Weibull model, the condition for screening benefit simplifies to

$$\exp\left\{\frac{(X_E - X_A)'\beta}{\eta}\right\} + \frac{\ell}{\{-\log(p)\}^{1/\eta}}\gamma \exp\left(\frac{X'_E\beta}{\eta}\right) < 1.$$

Just as seen under the exponential model, we note that  $\exp\{(X_E - X_A)'\beta\} < 1$ . Thus, given  $X_E$  and  $X_A$ , the conditional is more likely to be met when  $\gamma$  is small or  $\ell$  is small.

### Appendix A3. Conditional survival

Let  $S(\cdot)$  and  $\tilde{S}(\cdot)$  denote, respectively, the *unconditional* and *conditional* survival functions. The corresponding hazard functions are  $h(\cdot)$  and  $\tilde{h}(\cdot)$ .

We note that

$$\tilde{S}(u) = P(T_D > u \mid T_D > \ell) = \begin{cases} 1, & \text{if } u < \ell \\ \frac{P(T_D > u)}{P(T_D > \ell)}, & \text{if } u \geq \ell \end{cases}$$

Equivalently, with a change of variable with  $v = (u - \ell)$ ,

$$\tilde{S}(\ell + v) = \begin{cases} 1, & \text{if } v < 0 \\ \frac{S(\ell+v)}{S(\ell)}, & \text{if } v \geq 0 \end{cases}$$

It follows that the hazard function for the conditional survival is

$$\tilde{h}(u) = \begin{cases} 0, & \text{if } u < \ell \\ h(u), & \text{if } u \geq \ell \end{cases} \quad \stackrel{v=u-\ell}{\equiv} \quad \tilde{h}(\ell + v) = \begin{cases} 0, & \text{if } v < 0 \\ h(\ell + v), & \text{if } v \geq 0 \end{cases}$$

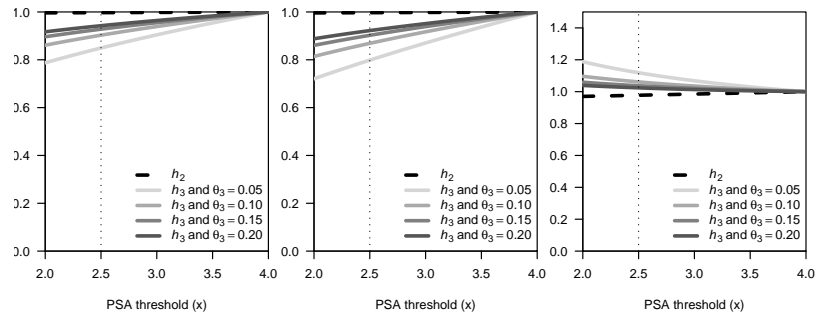

**Figure 1.** Sensitivity analysis to a different mean model for PSA. Relative hazard ratios (*RHRs*) for selected early detection rules under exponential survival overall grade (left panel) or stratified by low grade (middle panel) and high grade (right panel). The *RHRs* compare hazard ratios derived under hazard functions  $h_2$  and  $h_3$  when the PSA threshold for early detection is in the range of 2.0 to 4.0 ng/mL relative to the rule that uses PSA threshold of 4.0 ng/mL.

**Table 1**

*Sensitivity analysis to a different mean model for PSA. Lead times ( $\ell$ ) and hazard ratios (HRs) when actual diagnosis occurs at a PSA threshold of  $m(a_A) = 10.0$  ng/mL and early diagnosis occurs at a PSA threshold of  $m(a_E) = 2.5$  or  $4.0$  ng/mL under hazard functions  $h_2$  (using PSA only) and  $h_3$  (using PSA and age). Results assume an exponential survival model.*

| Hazard Function | $\theta_2$ | $\hat{\beta}_{PSA}$ | $\hat{\beta}_{AGE}$ | $m(a_E)$ | $\ell$ | HR   | SE   | 95% CI       |
|-----------------|------------|---------------------|---------------------|----------|--------|------|------|--------------|
| Overall         |            |                     |                     |          |        |      |      |              |
| $h_2$           | 0.10       | 0.002               |                     | 2.50     | 10.66  | 0.99 | 0.00 | [0.98, 0.99] |
|                 | 0.10       | 0.002               |                     | 4.00     | 7.05   | 0.99 | 0.00 | [0.98, 1.00] |
|                 | 0.20       | 0.002               |                     | 2.50     | 6.03   | 0.99 | 0.00 | [0.98, 0.99] |
|                 | 0.20       | 0.002               |                     | 4.00     | 3.98   | 0.99 | 0.00 | [0.98, 1.00] |
| $h_3$           | 0.10       | 0.002               | 0.03                | 2.50     | 10.66  | 0.74 | 0.09 | [0.58, 0.92] |
|                 | 0.10       | 0.002               | 0.03                | 4.00     | 7.05   | 0.82 | 0.06 | [0.70, 0.95] |
|                 | 0.20       | 0.002               | 0.03                | 2.50     | 6.03   | 0.84 | 0.05 | [0.73, 0.95] |
|                 | 0.20       | 0.002               | 0.03                | 4.00     | 3.98   | 0.89 | 0.04 | [0.81, 0.96] |
| Low Grade       |            |                     |                     |          |        |      |      |              |
| $h_2$           | 0.10       | 0.002               |                     | 2.50     | 10.66  | 0.99 | 0.01 | [0.97, 1.00] |
|                 | 0.10       | 0.002               |                     | 4.00     | 7.05   | 0.99 | 0.01 | [0.98, 1.00] |
|                 | 0.20       | 0.002               |                     | 2.50     | 6.03   | 0.99 | 0.01 | [0.97, 1.00] |
|                 | 0.20       | 0.002               |                     | 4.00     | 3.98   | 0.99 | 0.01 | [0.98, 1.00] |
| $h_3$           | 0.10       | 0.002               | 0.04                | 2.50     | 10.66  | 0.66 | 0.13 | [0.45, 0.94] |
|                 | 0.10       | 0.002               | 0.04                | 4.00     | 7.05   | 0.76 | 0.09 | [0.59, 0.96] |
|                 | 0.20       | 0.002               | 0.04                | 2.50     | 6.03   | 0.79 | 0.08 | [0.64, 0.96] |
|                 | 0.20       | 0.002               | 0.04                | 4.00     | 3.98   | 0.85 | 0.06 | [0.74, 0.97] |
| High Grade      |            |                     |                     |          |        |      |      |              |
| $h_2$           | 0.10       | 0.015               |                     | 2.50     | 10.66  | 0.89 | 0.05 | [0.80, 0.99] |
|                 | 0.10       | 0.015               |                     | 4.00     | 7.05   | 0.91 | 0.04 | [0.84, 0.99] |
|                 | 0.20       | 0.015               |                     | 2.50     | 6.03   | 0.89 | 0.05 | [0.80, 0.99] |
|                 | 0.20       | 0.015               |                     | 4.00     | 3.98   | 0.91 | 0.04 | [0.84, 0.99] |
| $h_3$           | 0.10       | 0.014               | -0.02               | 2.50     | 10.66  | 1.15 | 0.23 | [0.77, 1.67] |
|                 | 0.10       | 0.014               | -0.02               | 4.00     | 7.05   | 1.08 | 0.14 | [0.82, 1.39] |
|                 | 0.20       | 0.014               | -0.02               | 2.50     | 6.03   | 1.03 | 0.12 | [0.81, 1.30] |
|                 | 0.20       | 0.014               | -0.02               | 4.00     | 3.98   | 1.00 | 0.08 | [0.85, 1.18] |
